# Supplementary material
Source: PubMed Central journal article supplement (PMC5555078)
Supplement: NIHMS877335-supplement.pdf [file NIHMS877335-supplement.pdf]

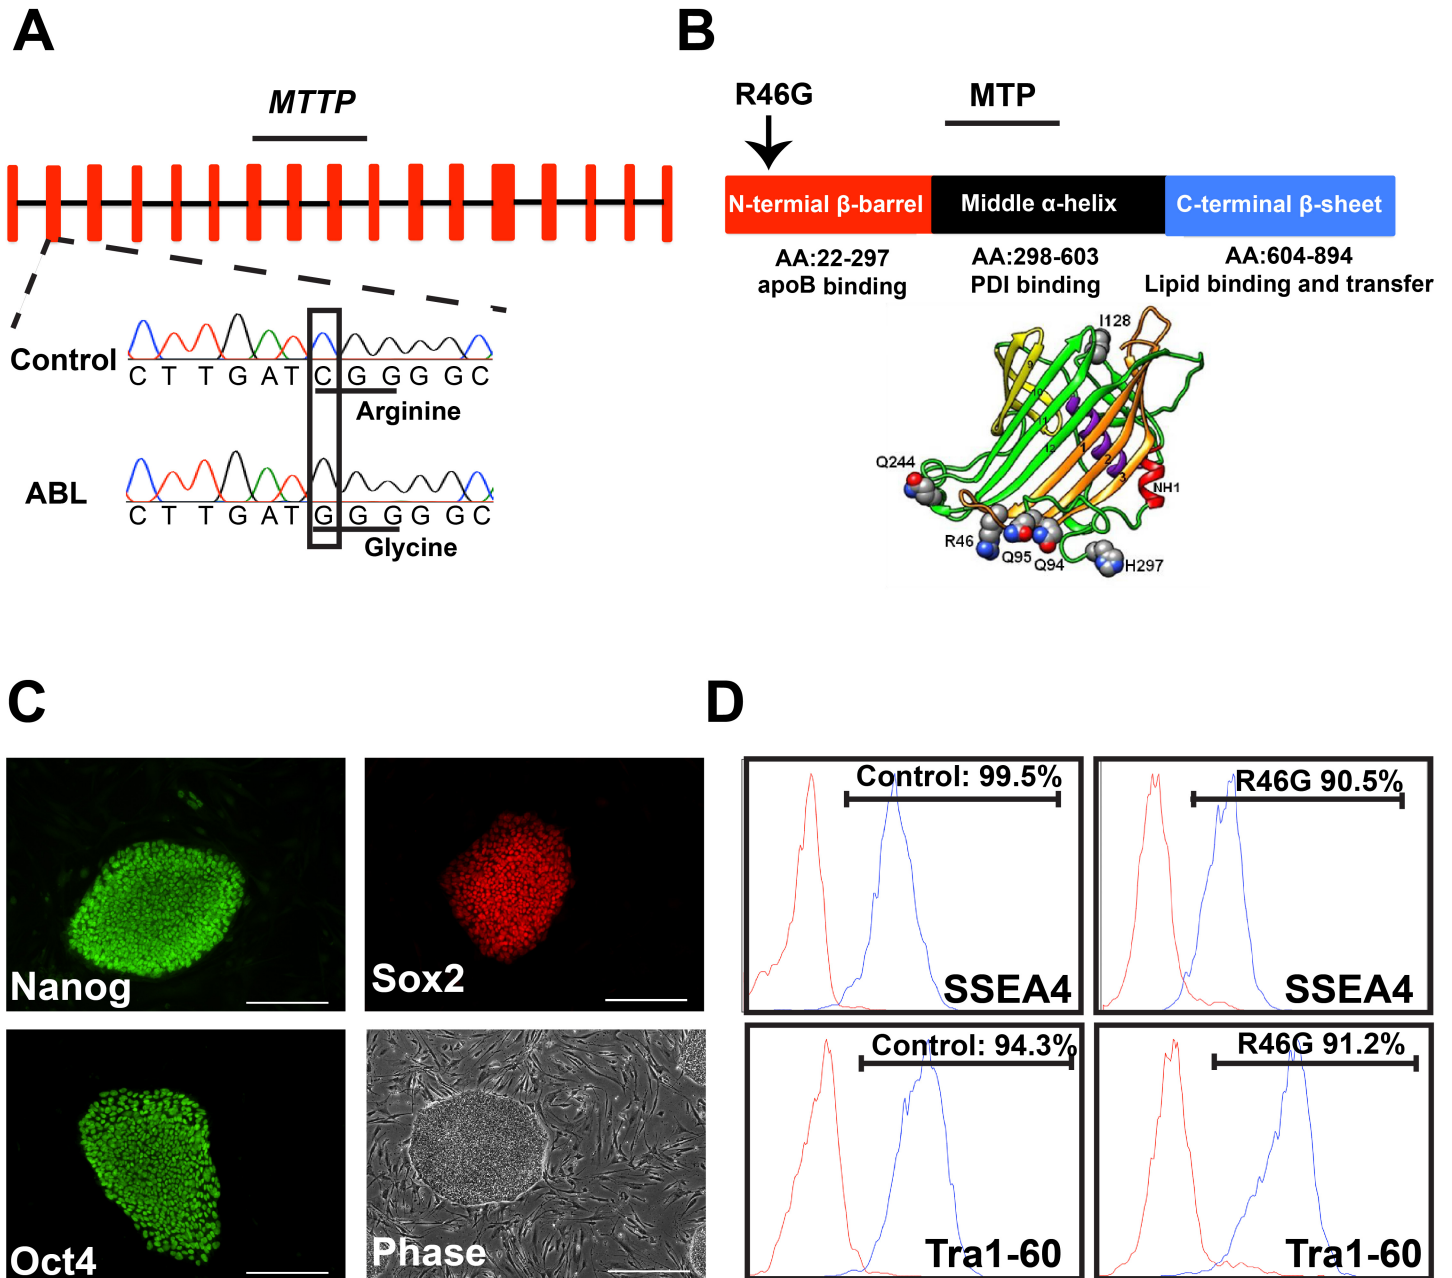

**Supplement Figure 1: Generation of ABL-specific iPSCs and confirmation of mutation.**

**Related to Figure 1**

(A) Sequence of MTP in iPSCs from the ABL patient showing a missense mutation c.136 C>G, p. Arg46Gly. (B) Predicted MTP protein structure and location of the mutation. Image used with permission from Walsh et al., 2015. (C) Representative images showing morphologies of iPSCs from control subjects. Scale bar: 200  $\mu$ m. (D) Quantification of SSEA4 and TRA1-60 by FACS analysis. Values are means and SEM for three or four independent experiments for all lipid analysis.

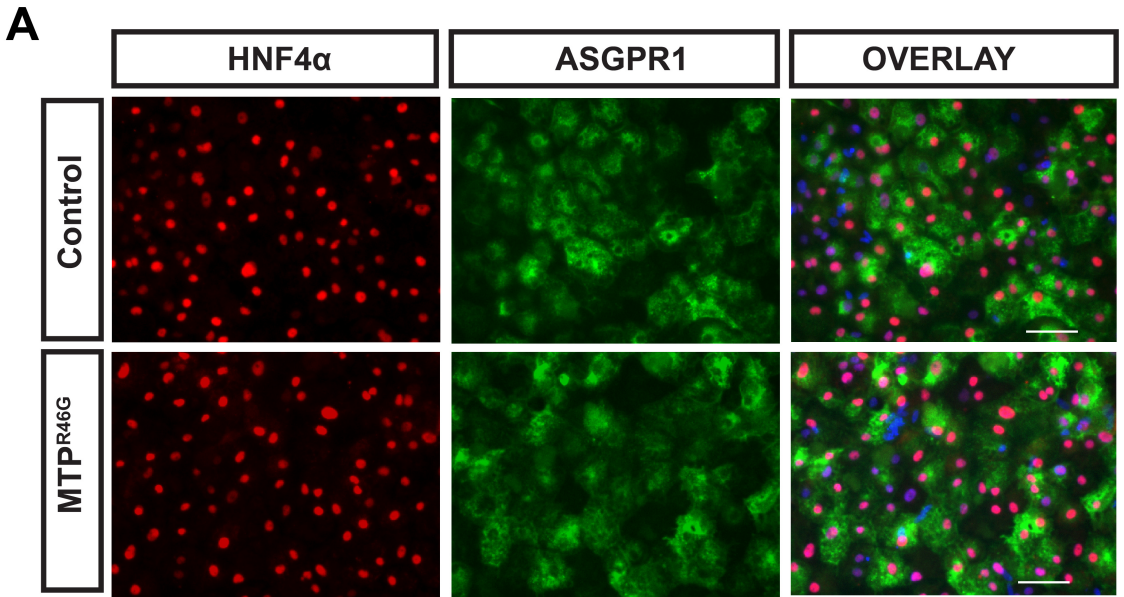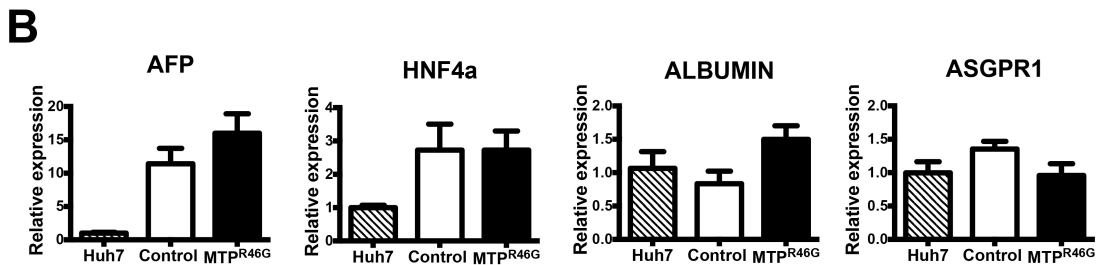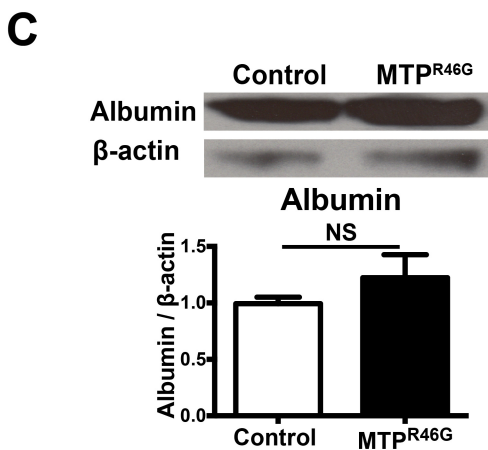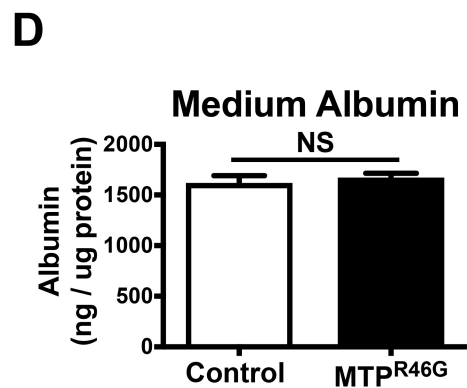

## Supplement Figure 2: Differentiation of iPSCs into hepatocytes.

### Related to Figure 1

(A) Representative images showing positive immunostaining of hepatocyte markers HNF4 $\alpha$  (red) and ASGPR1 (green). Scale bar: 100  $\mu$ m.

(B) Hepatic genes, such as HNF4 $\alpha$ , ALBUMIN, AFP, and ASGPR1 were analyzed by real-time PCR.

(C-D) Cellular and medium albumin levels were measured by western blotting and ELISA respectively.  $\beta$ -actin was blotted as a loading control.  $\pm$  S.D. Values are means for three experiments for all lipid analysis.

**A**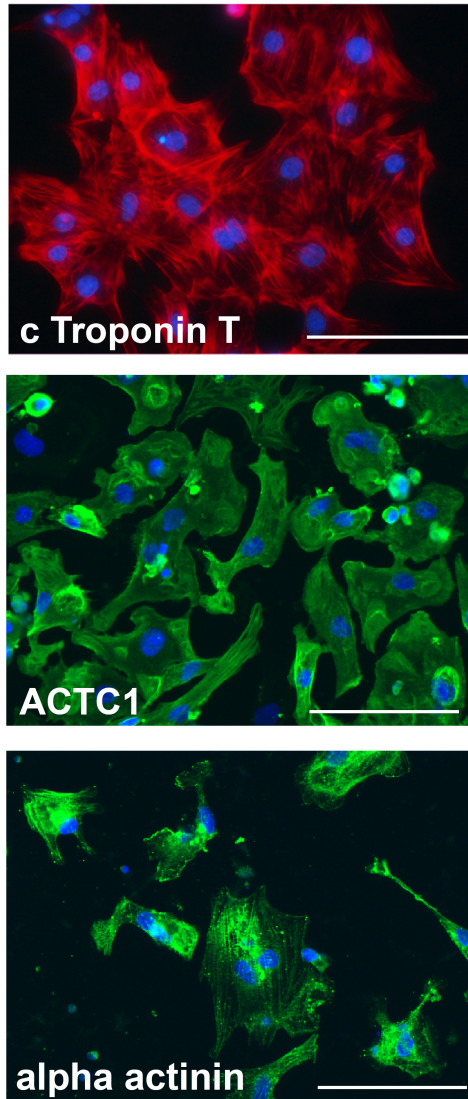**B**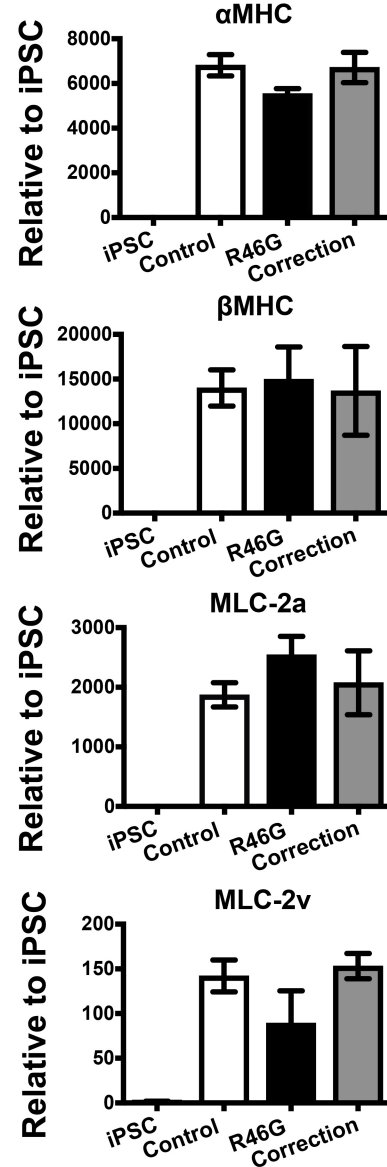**Supplement Figure 3: Differentiation of iPSCs into cardiomyocytes****Related to Figure 4**

(A) Representative images of immunofluorescence staining of cardiomyocyte markers in iPSCs derived cardiomyocytes from control subjects. Scale bar: 200  $\mu$ m (B) Expression of cardiac-specific markers, such as,  $\alpha$ MHC,  $\beta$ MHC, MLC2A, and MLC2V.  $\pm$  S.D. Values are means for three independent experiments.

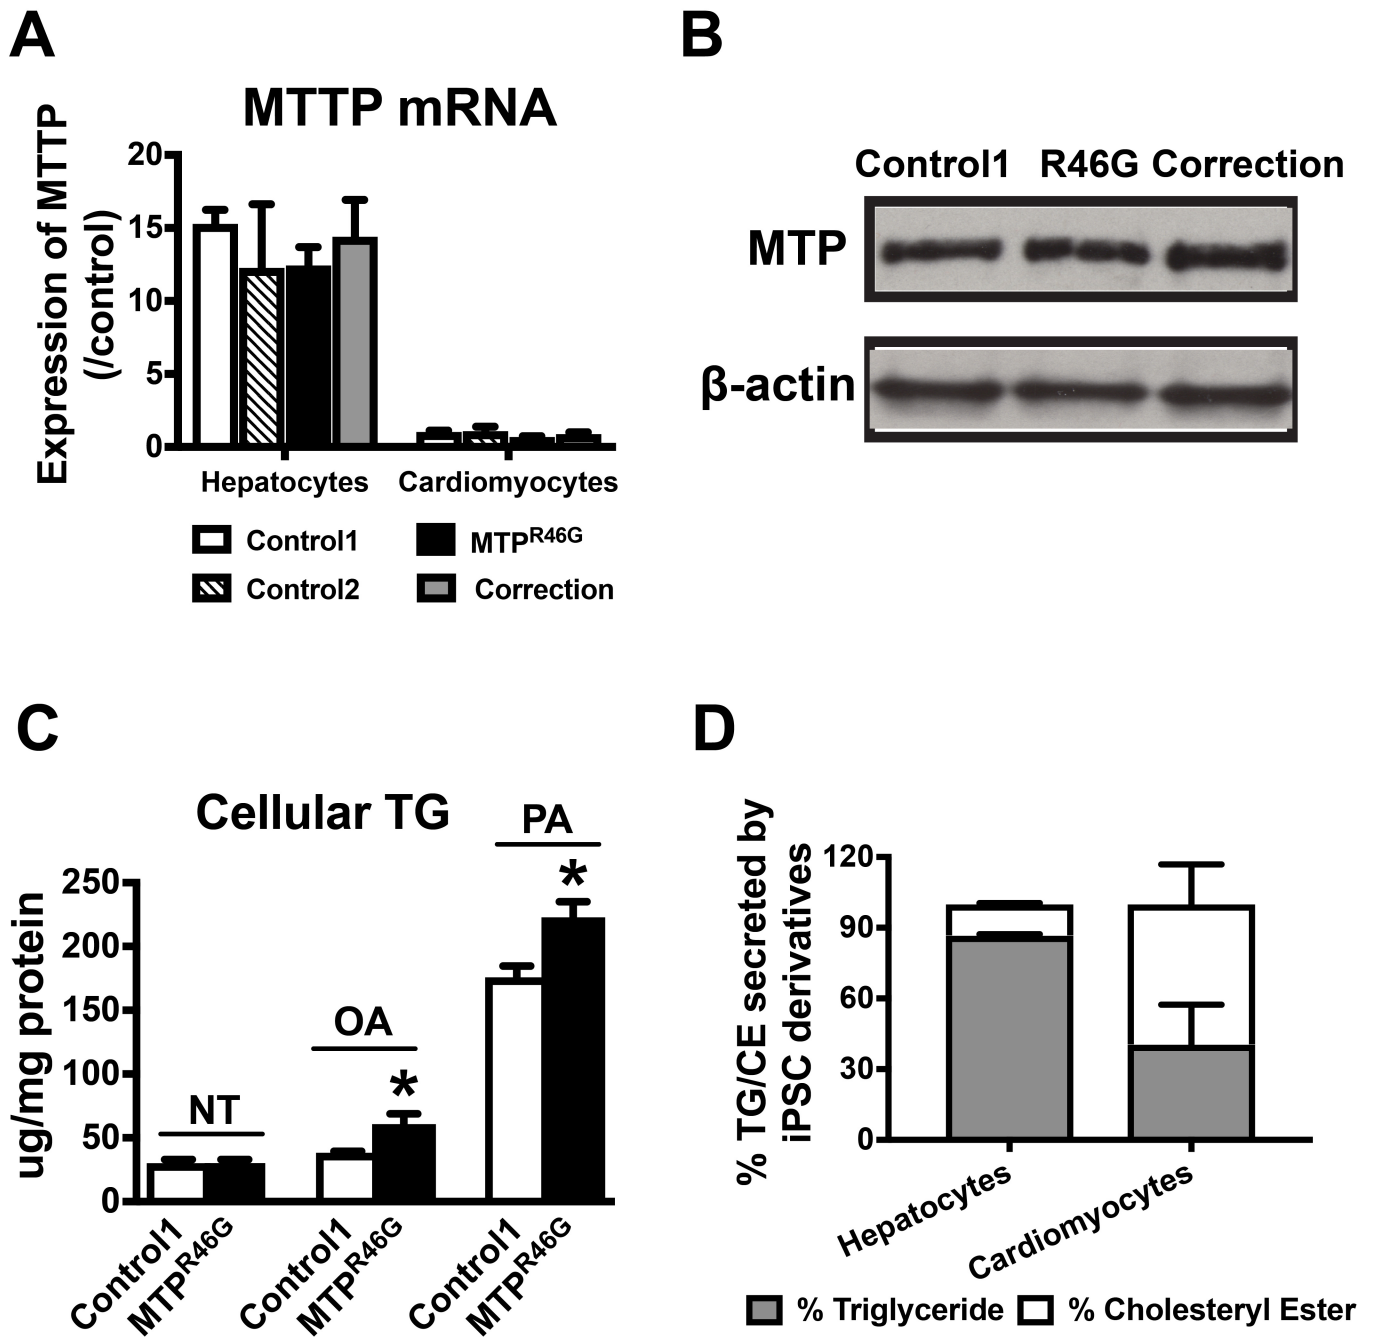

**Supplement Figure 4: Elevated cellular TG in MTP<sup>R46G</sup> cardiomyocytes.**

**Related to Figure 4**

(A-B) Quantification of messenger RNA MTTP and protein of MTP by real-time PCR and western blot. (C) Cellular TG contents were measured by enzymatic assays and normalized to total protein. (D) Percentage of secreted [<sup>14</sup>C] OA counts in either TG or CE as determined by thin layer chromatography separation in hepatocytes and cardiomyocytes.  $\pm$  S.D. \* $P < 0.05$ . Values are means for three independent experiments.

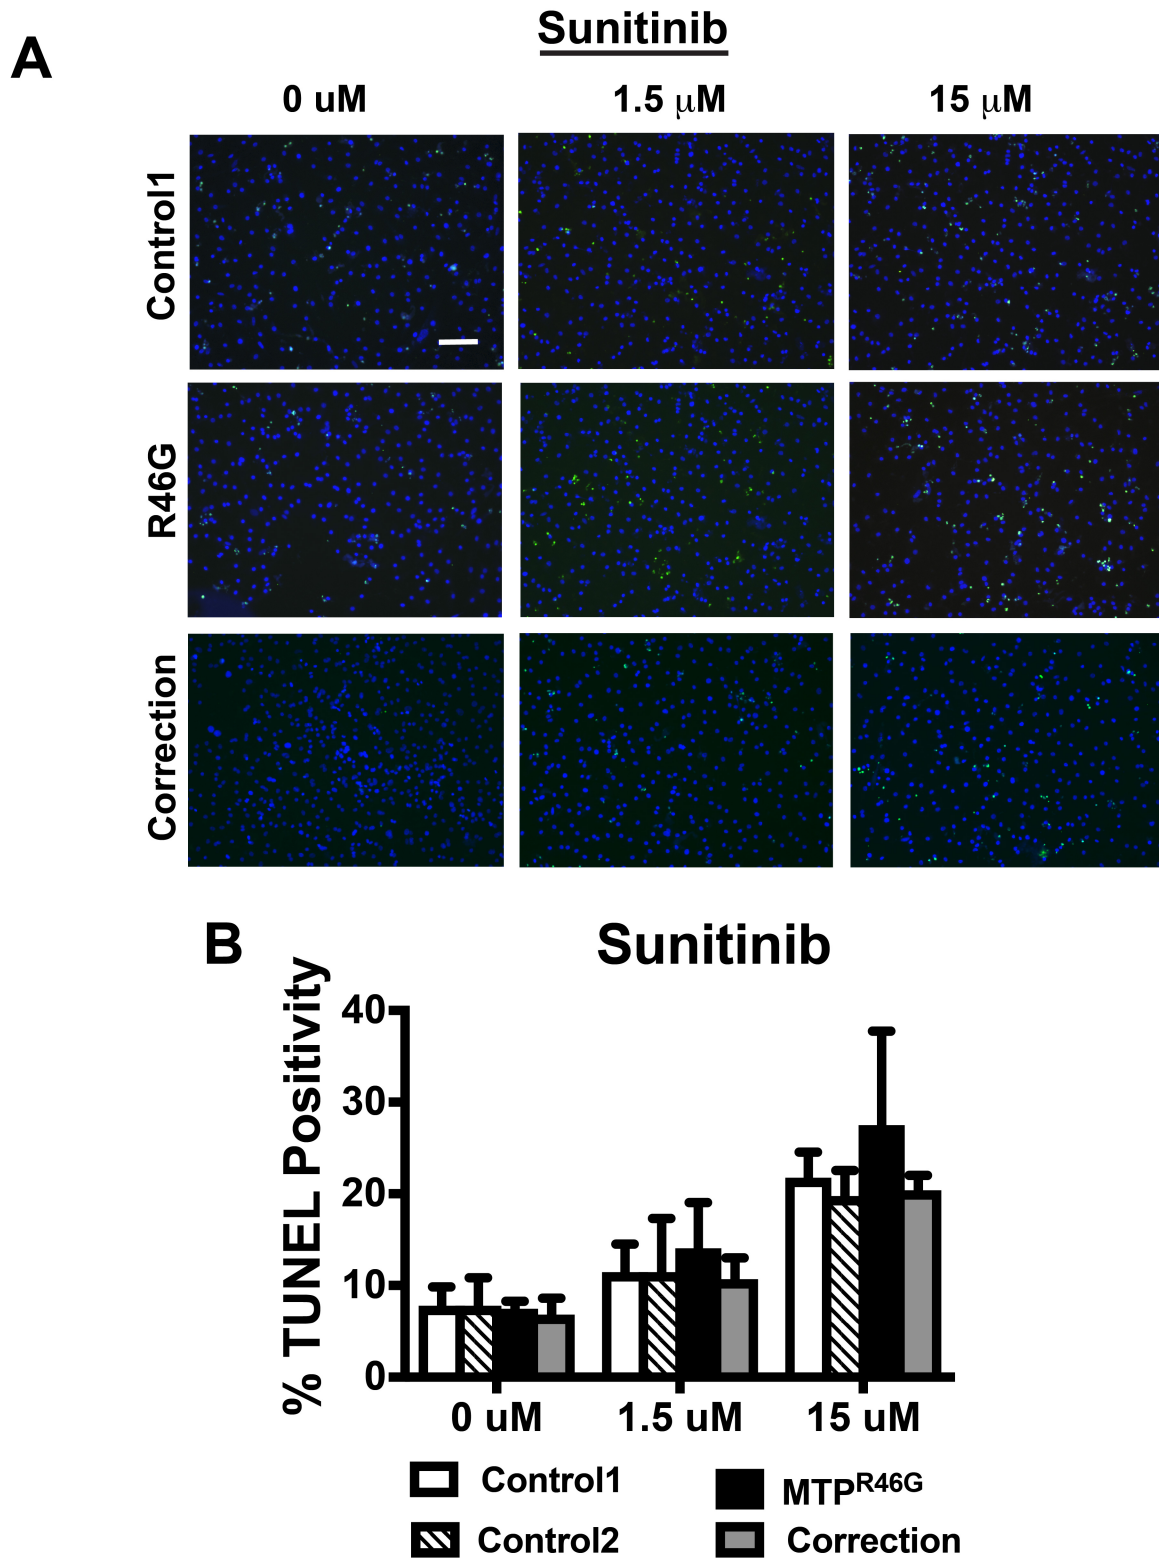

**Supplement Figure 5: Sunitinib and staurosporine induced dose-dependent apoptosis in iPSC-derived cardiomyocytes.**

**Related to Figure 5**

(A) Representative images of TUNEL staining in sunitinib (0, 1.5 $\mu$ M, 15 $\mu$ M) treated cardiomyocytes.

Scale bar: 150  $\mu$ m. (B) Percentage of apoptotic cells were counted by Image J (>1000 cells per condition).

(C) Percentage of TUNEL positivity in iPSC-derived cardiomyocytes induced by staurosporine (1 $\mu$ M) and PA (0.5mM).

(D) Expression of Caspase3 and Caspase9 upon staurosporine and PA treatment were analyzed by real-time PCR.  $\pm$  S.D.

\*P<0.05. Values are means for three independent experiments.

**Table S1. Subject Lipid Panel Results  
Related to Figure 1**

| Subject      | Race  | Sex  | Age | TC    | VLDL | LDL | HDL | TG  | ApoAI | ApoB |
|--------------|-------|------|-----|-------|------|-----|-----|-----|-------|------|
|              |       |      |     | mg/dl |      |     |     |     |       |      |
| Control (M8) | White | Male | 66  | 166   | 22   | 102 | 42  | 130 | 137   | 85   |
| ABL (M7)     | White | Male | 60  | 52    | -    | 13  | 40  | 10  | 61    | 10   |

TC: total cholesterol; VLDL: very low density lipoprotein; LDL: low density lipoprotein; HDL: high density lipoprotein; TG: triglyceride; ApoAI: apolipoprotein A-I; ApoB: apolipoprotein B; "-" indicates undetectable; Age reflects age at time of visit.

**Table S2. IPS clones from subjects  
Related to Figure 1**

| <b>Subject</b> | <b>iPSC clones</b> | <b>WiCell ID</b> |
|----------------|--------------------|------------------|
| Control1       | iPS-M8-SeV2        | PENN156i-M8-2*   |
|                | iPS-M8-SeV3        | N/A              |
|                | iPS-M8-SeV5        | N/A              |
| Control2       | iPS-SV20           | PENN123i-SV20*   |
|                | iPS-SV10           | PENN078i-SV10*   |
| ABL (R46G)     | iPS-M7-SeV16       | PENN144i-M7-16*  |
|                | iPS-M7-SeV14       | N/A              |
|                | iPS-M7-SeV9        | N/A              |

N/A: not available. \*Detailed cell line information can be found at:  
<http://www.wicell.org/home/stem-cell-lines/catalog-of-stem-cell-lines/collections/nhlbi-next-gen-rader.cmsx>
